# Supplementary material for: Efficacy of HD201 vs Referent Trastuzumab in Patients With ERBB2-Positive Breast Cancer Treated in the Neoadjuvant Setting: A Multicenter Phase 3 Randomized Clinical Trial
Source: PubMed Central journal article supplement — JAMA Oncol. 2022 Mar 3;8(5):698–705. doi: 10.1001/jamaoncol.2021.8171 (PMC8895313; doi:10.1001/jamaoncol.2021.8171), 2022-03-03
Supplement: jamaoncol-e218171-s003.pdf [file jamaoncol-e218171-s003.pdf]

## Supplemental Online Content

Pivot X, Georgievich MA, Shamrai V, et al. Efficacy of HD201 vs referent trastuzumab in patients with ERBB2-positive breast cancer treated in the neoadjuvant setting: a multicenter phase 3 randomized clinical trial. *JAMA Oncol*. Published online March 3, 2022. doi:10.1001/jamaoncol.2021.8171

**eTable 1.** Concordance analysis of locally versus centrally assessed breast and total pathological complete response (bpCR and tpCR) in the PPS population

**eTable 2.** Efficacy results in the mFAS and rPPS populations

This supplemental material has been provided by the authors to give readers additional information about their work.

**eTable 1.** Concordance analysis of locally versus centrally assessed breast and total pathological complete response (bpCR and tpCR) in the PPS population

|                           | Locally assessed tpCR n |     |       |            |     |       |       |     |       |
|---------------------------|-------------------------|-----|-------|------------|-----|-------|-------|-----|-------|
|                           | HD201                   |     |       | Herceptin® |     |       | Total |     |       |
|                           | Yes                     | No  | Total | Yes        | No  | Total | Yes   | No  | Total |
| Centrally assessed tpCR n |                         |     |       |            |     |       |       |     |       |
| Yes                       | 83                      | 19  | 102   | 92         | 20  | 112   | 175   | 39  | 214   |
| No                        | 10                      | 93  | 103   | 15         | 89  | 104   | 25    | 182 | 207   |
| Total                     | 93                      | 112 | 205   | 107        | 109 | 216   | 200   | 221 | 421   |
|                           | Locally assessed bpCR n |     |       |            |     |       |       |     |       |
|                           | HD201                   |     |       | Herceptin® |     |       | Total |     |       |
|                           | Yes                     | No  | Total | Yes        | No  | Total | Yes   | No  | Total |
| Centrally assessed bpCR n |                         |     |       |            |     |       |       |     |       |
| Yes                       | 110                     | 19  | 129   | 107        | 16  | 123   | 217   | 35  | 252   |
| No                        | 12                      | 88  | 100   | 18         | 87  | 105   | 30    | 175 | 205   |
| Total                     | 122                     | 107 | 229   | 125        | 103 | 228   | 247   | 210 | 457   |

For tpCR, there was agreement between the 2 assessments for 357 of the 421 subjects with both assessments (84.8%, 95% CI: [81.0%, 88.1%]). The propensity of achieving tpCR based on the local or central assessment was similar (McNemar test:  $p=0.080$ ). The number of patients (n) is provided for each category. For bpCR, there was agreement between the 2 assessments for 392 of the 457 subjects with both assessments (85.8%, 95% CI: [82.2%, 88.8%]). The propensity of achieving bpCR based on the local or central assessment was similar (McNemar test:  $p=0.535$ ). The number of patients (n) is provided for each category.

**eTable 2.** Efficacy results in the mFAS and rPPS populations

| <b>Group</b>                                                           | <b>HD201</b>  | <b>Herceptin®</b> | <b>Difference</b> | <b>Difference</b> | <b>Ratio</b>      | <b>Ratio</b>     |
|------------------------------------------------------------------------|---------------|-------------------|-------------------|-------------------|-------------------|------------------|
| <b>mFAS</b>                                                            | <b>N =250</b> | <b>N = 252</b>    | <b>Unadjusted</b> | <b>Adjusted*</b>  | <b>Unadjusted</b> | <b>Adjusted*</b> |
| <b>Locally Assessed Total Pathological Complete Response (tpCR)</b>    |               |                   |                   |                   |                   |                  |
| Responders, n (%)                                                      | 108 (44.6)    | 116 (47.3)        | -2.7              | -1.0              | 0.94              | 0.92             |
| 95% CI                                                                 | [38.3; 51.1]  | [41.0; 53.8]      | [-11.7; 6.2]      | [-9.6; 7.7]       | [0.78; 1.14]      | [0.76; 1.10]     |
| <b>Centrally Assessed Total Pathological Complete Response (tpCR)</b>  |               |                   |                   |                   |                   |                  |
| Responders, n (%)                                                      | 103 (49.5)    | 112 (50.7)        | -1.2              | -1.1              | 0.98              | 0.97             |
| 95% CI                                                                 | [42.5; 56.5]  | [43.9; 57.4]      | [-10.6; 8.3]      | [-10.2; 8.0]      | [0.81; 1.18]      | [0.81; 1.16]     |
| <b>Locally Assessed Breast Pathological Complete Response (bpCR)</b>   |               |                   |                   |                   |                   |                  |
| Responders, n (%)                                                      | 127 (52.5)    | 128 (52.2)        | 0.2               | 0.8               | 1.00              | 0.97             |
| 95% CI                                                                 | [46.0; 58.9]  | [45.8; 58.6]      | [-8.7; 9.2]       | [-7.9; 9.5]       | [0.85; 1.19]      | [0.83; 1.14]     |
| <b>Centrally Assessed Breast Pathological Complete Response (bpCR)</b> |               |                   |                   |                   |                   |                  |
| Responders, n (%)                                                      | 131 (56.2)    | 125 (52.7)        | 3.5               | 3.8               | 1.07              | 1.04             |
| 95% CI                                                                 | [49.6; 62.7]  | [46.2; 59.2]      | [-5.6; 12.6]      | [-5.0; 12.7]      | [0.90; 1.26]      | [0.89; 1.22]     |
| <b>Overall Response at the End of Neoadjuvant Treatment</b>            |               |                   |                   |                   |                   |                  |
| Responders, n (%)                                                      | 220 (88)      | 218 (86.5)        | 1.5               | 1.8               | 1.02              | 1.02             |
| 95% CI                                                                 |               |                   | [-7.3; 10.1]      | [-3.9; 7.4]       | [0.95%; 1.09]     | [0.96; 1.09]     |
| <b>Group</b>                                                           | <b>HD201</b>  | <b>Herceptin®</b> | <b>Difference</b> | <b>Difference</b> | <b>Ratio</b>      | <b>Ratio</b>     |
| <b>rPPS</b>                                                            | <b>N =230</b> | <b>N = 233</b>    | <b>Unadjusted</b> | <b>Adjusted*</b>  | <b>Unadjusted</b> | <b>Adjusted*</b> |
| <b>Locally Assessed Total Pathological Complete Response (tpCR)</b>    |               |                   |                   |                   |                   |                  |
| Responders, n (%)                                                      | 107 (46.5)    | 115 (49.4)        | -2.8              | -1.9              | 0.94              | 0.90             |
| 95% CI                                                                 | [39.9; 53.2]  | [42.8; 56.0]      | [-12.0; 6.4]      | [-10.8; 7.0]      | [0.78; 1.14]      | [0.76; 1.08]     |
| <b>Centrally Assessed Total Pathological Complete Response (tpCR)</b>  |               |                   |                   |                   |                   |                  |
| Responders, n (%)                                                      | 101 (49.8)    | 109 (51.2)        | -1.4              | -1.3              | 0.97              | 0.96             |
| 95% CI                                                                 | [42.7; 56.8]  | [44.3; 58.1]      | [-11.0; 8.2]      | [-10.6; 7.9]      | [0.80; 1.18]      | [0.81; 1.15]     |
| <b>Locally Assessed Breast Pathological Complete Response (bpCR)</b>   |               |                   |                   |                   |                   |                  |
| Responders, n (%)                                                      | 122 (53.0)    | 125 (53.6)        | -0.6              | -0.3              | 0.99              | 0.95%            |
| 95% CI                                                                 | [46.4; 59.6]  | [47.0; 60.2]      | [-9.8; 8.6]       | [-9.2; 8.5]       | [0.83; 1.17]      | [0.81; 1.12]     |
| <b>Centrally Assessed Breast Pathological Complete Response (bpCR)</b> |               |                   |                   |                   |                   |                  |

|                   |              |              |              |              |              |              |
|-------------------|--------------|--------------|--------------|--------------|--------------|--------------|
| Responders, n (%) | 126 (56.5)   | 120 (53.3)   | 3.2          | 3.4          | 1.06         | 1.03         |
| 95% CI            | [49.7; 63.1] | [46.6; 60.0] | [-6.1; 12.6] | [-5.7; 12.4] | [0.90; 1.25] | [0.87; 1.21] |

\*Adjusted for stratification factors. The effect of the stratification factors was evaluated using an adapted logistic model consisting of a combination of logistic, binomial, and log-binomial regression (referred to as adapted logistic regression). N: number of patients in the population; n: number of patients; (%) percentage of patients.
